# Supplementary material for: Nutritionist Visits, Diabetes Classes, and Hospitalization Rates and Charges
Source: Oxford University Press journal article supplement (doi:10.2337/dc07-1871), 2008-03-28
Supplement: dc071871onlineonlyappendix.doc [file dc071871onlineonlyappendix.doc]

**CONTENT OF EDUCATIONAL VISITS**

**NUTRITIONIST VISITS**

For diabetic clients these visits could have included discussion of: principles of healthy eating; portion sizes; instruction about an individualized meal plan; calorie control; what foods are carbohydrates and how many servings are appropriate; instruction in the exchange system (in the 1990s) and more recently carbohydrate counting; how to cut down on fat and cholesterol; how to cut down on salt; increasing fiber intake; foods to substitute on sick days; eating out and on special occasions, and the importance of exercise and taking medication as prescribed. Available handouts would have been used and explained. Problem solving discussions would have also occurred. In certain situations the visits might also have included reinforcement of proper insulin administration technique and use of a blood glucose monitor.

**DIABETES CLASSES**

Major topics covered in the diabetes classes were:

- What diabetes is, symptoms, types, how diagnosed, how managed, the A1C test, target blood sugar levels
- Healthy eating (including everything listed under the nutritionist visits)
- Exercise
- Diabetes medications
- High and low blood sugar
- Sick day rules and choosing over-the-counter medicines
- Psychological adjustment and stress management
- Long term complications and their prevention
- Taking good care of feet, eyes and teeth/gums
- Blood sugar and ketone testing
- Travel tips

**HEALTH EDUCATION VISITS RELATED TO DIABETES CLASSES**

1. **Pre-class interviews:** completion of a diabetes history/self-care practices questionnaire; assessment of knowledge, attitudes and psychomotor skills, including insulin administration if applicable and blood glucose testing; documentation of learning goals; answering client’s questions
2. **Post-class interviews:** re-assessment of knowledge, attitudes and psychomotor skills and achievement of learning goals; documentation of a behavior change goal; answering client’s questions
3. **Follow-up:** completion of follow-up questionnaire; evaluation of achievement of behavior change goal and setting a new goal; answering client’s questions; problem solving discussions

**OTHER HEALTH EDUCATION VISITS**

These visits could have included discussion of a wide range of health-related topics or instruction in any part of the client’s treatment plan. Instruction in insulin administration and blood glucose monitoring (if taught by someone other than a nutritionist or registered dietitian) would have been coded on the encounter form as a health education visit. Also, any dietary teaching done by RNs would most likely have been coded as health education. Problem solving would have been included if appropriate.
